# Supplementary material for: Determination of DNA adenine methylation in genomes of mammals and plants by liquid chromatography/mass spectrometry
Source: Royal Society of Chemistry journal article supplement (doi:10.1039/c5ra05307b), 2015-01-01
Supplement: c5ra05307b1.pdf [file c5ra05307b1.pdf]

**Supporting Information**

**for**

**“Determination of DNA Adenine Methylation in Genomes  
of Mammals and Plants by Liquid Chromatography /  
Mass Spectrometry”**

Wei Huang,<sup>1</sup> Jun Xiong,<sup>1</sup> Ying Yang,<sup>2</sup> Song-Mei Liu,<sup>2</sup> Bi-Feng Yuan<sup>1,\*</sup>, Yu-Qi Feng<sup>1</sup>

<sup>1</sup> Key Laboratory of Analytical Chemistry for Biology and Medicine (Ministry of Education),

Department of Chemistry, Wuhan University, Wuhan 430072, P.R. China

<sup>2</sup> Center for Gene Diagnosis, Zhongnan Hospital of Wuhan University, Donghu Road 169#,

Wuhan, 430071, P.R. China

\*To whom correspondence should be addressed. Tel.: +86-27-68755595; fax: +86-27-68755595. E-mail address: bfyuan@whu.edu.cn

Table S1. The MRM transitions and optimal parameters for the analysis of nucleosides by mass spectrometry.

| Nuclosides        | Precursor ion | Product ion | DP/V | EP / V | CEP / V | CE / V | CXP / V |
|-------------------|---------------|-------------|------|--------|---------|--------|---------|
| m <sup>6</sup> dA | 266.1         | 150.2       | 21.8 | 7.0    | 16.6    | 19.0   | 2.5     |
| dA                | 252.4         | 136.2       | 15.0 | 5.0    | 15.0    | 23.0   | 2.0     |
| dC                | 228.4         | 112.2       | 11.0 | 5.0    | 15.0    | 23.0   | 3.0     |
| dG                | 268.4         | 152.4       | 15.0 | 5.0    | 20.0    | 23.0   | 5.0     |
| dT                | 243.3         | 127.2       | 25.0 | 5.0    | 15.0    | 23.0   | 5.0     |
| m <sup>6</sup> A  | 282.2         | 150.1       | 32.0 | 8.0    | 10.0    | 27.0   | 2.6     |
| rA                | 268.4         | 152.4       | 15.0 | 5.0    | 16.6    | 23.0   | 2.0     |
| rC                | 244.1         | 112.1       | 20.0 | 8.0    | 10.0    | 21.3   | 2.4     |
| rG                | 284.5         | 152.2       | 40.0 | 5.0    | 9.0     | 23.0   | 6.0     |
| rU                | 245.4         | 113.1       | 24.7 | 6.0    | 13.0    | 13.7   | 3.8     |

Table S2. m<sup>6</sup>dA and m<sup>6</sup>A contents in 15 T2DM patients and 15 control subjects.

| Sample Name | m <sup>6</sup> A/A,% | m <sup>6</sup> dA/dA,% |
|-------------|----------------------|------------------------|
| T2DM-1      | 0.11                 | 0.00030                |
| T2DM-2      | 0.09                 | 0.00031                |
| T2DM-3      | 0.10                 | 0.00029                |
| T2DM-4      | 0.10                 | 0.00031                |
| T2DM-5      | 0.10                 | 0.00023                |
| T2DM-6      | 0.10                 | 0.00027                |
| T2DM-7      | 0.12                 | 0.00033                |
| T2DM-8      | 0.13                 | 0.00027                |
| T2DM-9      | 0.12                 | 0.00034                |
| T2DM-10     | 0.13                 | 0.00025                |
| T2DM-11     | 0.13                 | 0.00025                |
| T2DM-12     | 0.14                 | 0.00028                |
| T2DM-13     | 0.12                 | 0.00023                |
| T2DM-14     | 0.11                 | 0.00027                |
| T2DM-15     | 0.12                 | 0.00028                |
| Control-1   | 0.12                 | 0.00034                |
| Control-2   | 0.18                 | 0.00033                |
| Control-3   | 0.17                 | 0.00030                |
| Control-4   | 0.16                 | 0.00030                |
| Control-5   | 0.16                 | 0.00032                |
| Control-6   | 0.16                 | 0.00034                |
| Control-7   | 0.17                 | 0.00031                |
| Control-8   | 0.17                 | 0.00038                |
| Control-9   | 0.19                 | 0.00048                |
| Control-10  | 0.20                 | 0.00039                |
| Control-11  | 0.16                 | 0.00022                |
| Control-12  | 0.21                 | 0.00037                |
| Control-13  | 0.23                 | 0.00033                |
| Control-14  | 0.26                 | 0.00028                |
| Control-15  | 0.19                 | 0.00033                |

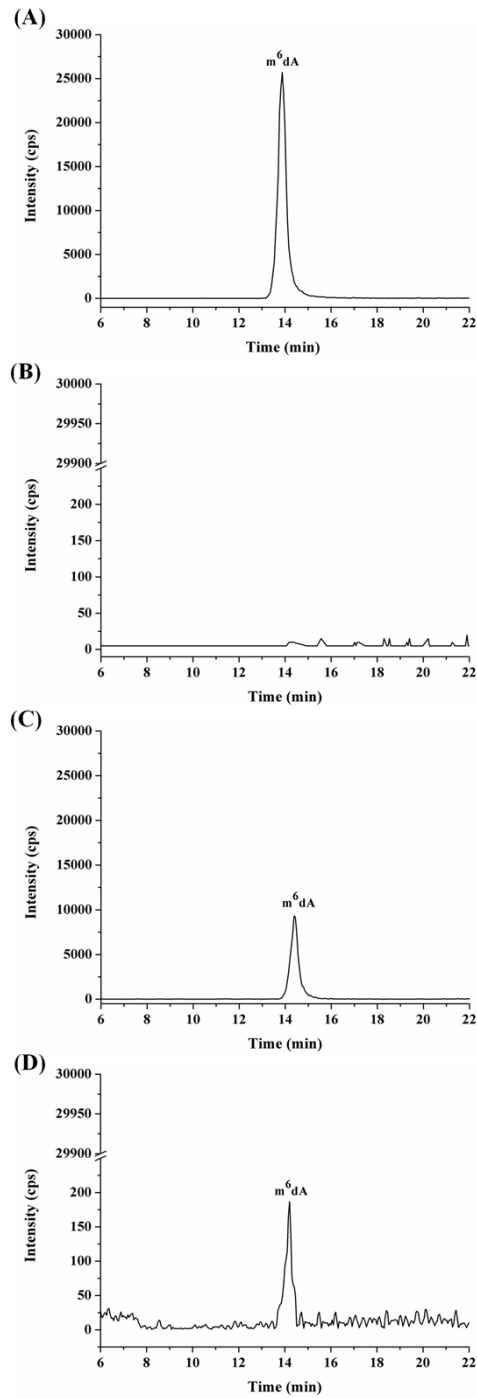

Figure S1. Elimination of possible bacterial DNA by Dpn I cleavage coupled with size-exclusion ultrafiltration. MRM chromatograms of  $m^6dA$  from (A) 100 ng bacterial DNA, (B) the retentate of 100 ng bacterial DNA treated by Dpn I cleavage coupled with size-exclusion ultrafiltration, (C) 5  $\mu$ g 293T DNA, (D) the retentate of 5  $\mu$ g 293T DNA treated by Dpn I cleavage coupled with size-exclusion ultrafiltration.

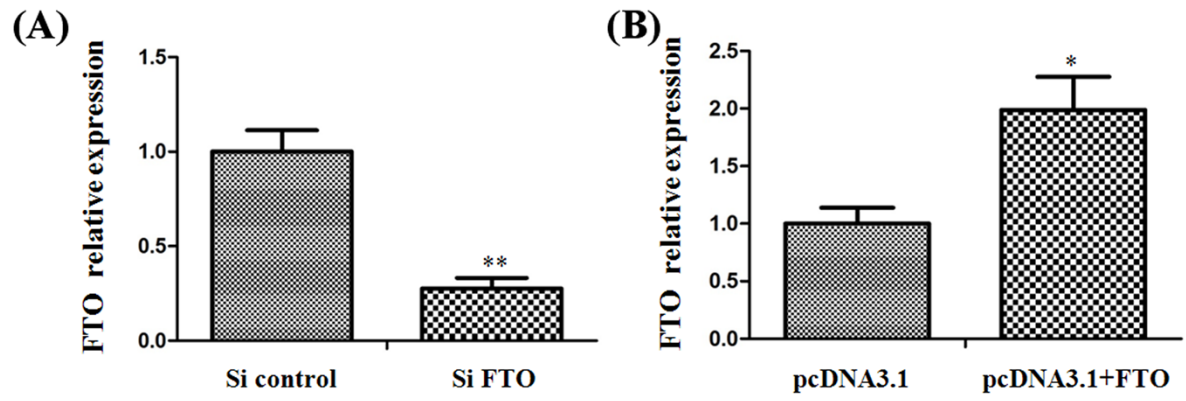

Figure S2. Expression levels of *FTO* gene in cells upon knockdown and overexpression.\*  $p < 0.05$ , \*\* $p < 0.01$ .
